# Supplementary material for: Fundamental insight into enhanced activity of Pd/CeO2thin films in hydrogen oxidation reaction in alkaline media
Source: Royal Society of Chemistry journal article supplement (doi:10.1039/d3ta01879b), 2023-01-01
Supplement: d3ta01879b1.pdf [file d3ta01879b1.pdf]

# **Fundamental insight into enhanced activity of Pd/CeO<sub>2</sub> thin films in hydrogen oxidation reaction in alkaline media** *Supporting information*

Authors: Mathilde Luneau<sup>1, 2\*</sup>, Linnéa Strandberg<sup>2</sup>, Gerard Montserrat-Sisó<sup>2</sup>, Victor Shokhen<sup>2</sup>, Roopathy Mohan<sup>2</sup>, Henrik Grönbeck<sup>2</sup>, Björn Wickman<sup>2</sup>

1. Department of Chemistry and Chemical Engineering and Competence Centre for Catalysis, Chalmers University of Technology, Gothenburg, SE 41296 (Sweden)
2. Department of Physics and Competence Centre for Catalysis, Chalmers University of Technology, Gothenburg, SE 41296 (Sweden)

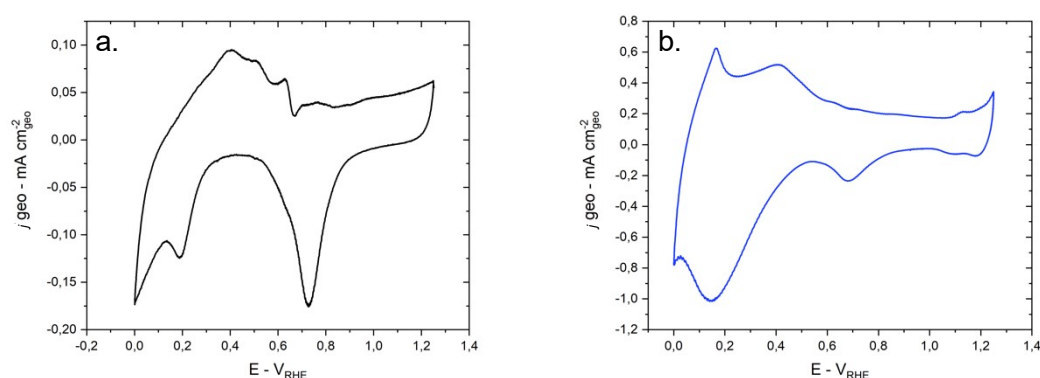

Figure S1: CV at 50mV.s<sup>-1</sup> during conditioning on a. pure Pd quartz crystal b. Pd/CeO<sub>2</sub> quartz crystal

Table S1: ECSA measured on glassy carbon electrodes and quartz crystals before and after reaction

| Methods             |                                                  |       | GCE         |                     | QCM         |                     |
|---------------------|--------------------------------------------------|-------|-------------|---------------------|-------------|---------------------|
|                     |                                                  |       | Pd          | Pd/CeO <sub>2</sub> | Pd          | Pd/CeO <sub>2</sub> |
| Pd oxides reduction | ECSA before HOR (cm <sup>2</sup> <sub>Pd</sub> ) |       | 0.40 ± 0.01 | 0.41 ± 0.01         | 0.35 ± 0.01 | 0.35 ± 0.1          |
|                     | ECSA after HOR (cm <sup>2</sup> <sub>Pd</sub> )  |       | 0.36 ± 0.01 | 0.37 ± 0.01         | /           | /                   |
| CO stripping        | ECSA after HOR (cm <sup>2</sup> <sub>Pd</sub> )  | run 1 | /           | /                   | 0.39 ± 0.01 | 0.34 ± 0.01         |
|                     |                                                  | run 2 | /           | /                   | 0.34 ± 0.01 | 0.34 ± 0.01         |
|                     |                                                  | run 3 | /           | /                   | 0.36 ± 0.01 | 0.35 ± 0.01         |

Table S2: Comparison of specific activity with other published results

|                               | Specific activity at 0.1 V <sub>RHE</sub><br>$j - \text{mA cm}^{-2}_{\text{Pd}}$ | Reference          |
|-------------------------------|----------------------------------------------------------------------------------|--------------------|
| Pd thin film                  | 0.003                                                                            | This work          |
| Pd/CeO <sub>2</sub> thin film | 0.122                                                                            | This work          |
| Pd black                      | 0.002                                                                            | Yarmiayev et al. * |
| 7% ceria-doped Pd black       | 0.051                                                                            | Yarmiayev et al. * |
| 11% ceria-doped Pd black      | 0.14                                                                             | Yarmiayev et al. * |

\* Yarmiayev et al 2019 *J. Electrochem. Soc.* 166 F3234, measurements performed at 900 rpm

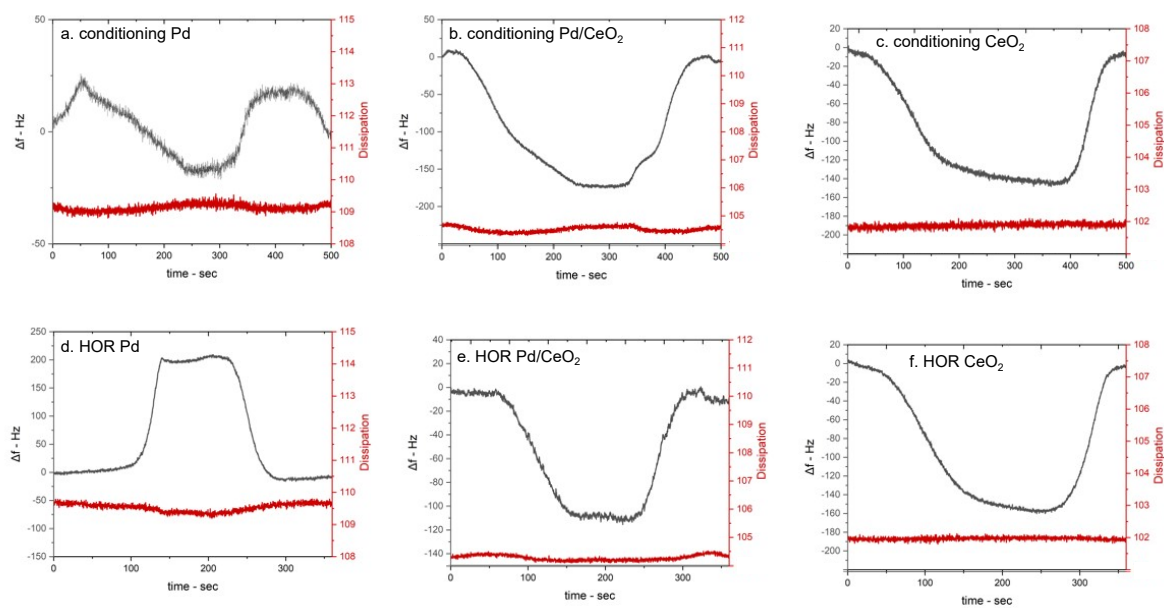

Figure S2: Dissipation measurements during conditioning and HOR on Pd, Pd/CeO<sub>2</sub> and CeO<sub>2</sub> only.

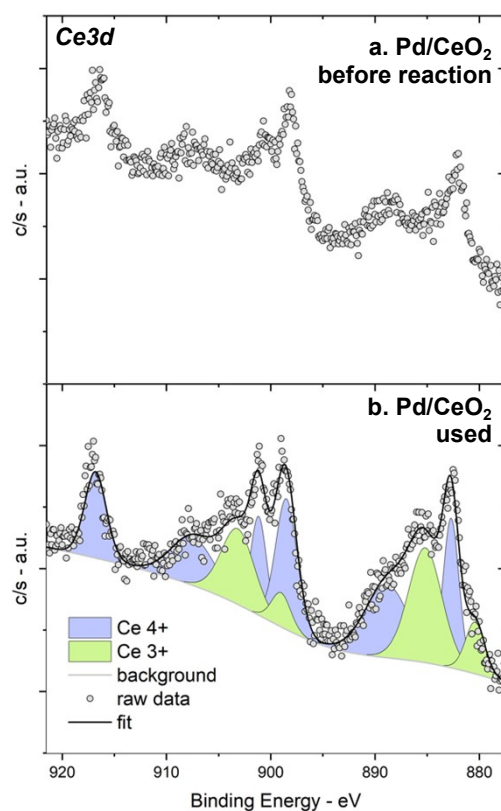

Figure S3: XPS spectra of the Ce3d region measured before (a) and after (b) reaction showing characteristic peaks of Ce<sup>4+</sup> species in three doublets, as well as of Ce<sup>3+</sup> species in two doublets.

Table S3: Surface composition of Pd/CeO<sub>2</sub> as measured by XPS before and after HOR

|                                                  | Binding energy | Before HOR  | After HOR   |
|--------------------------------------------------|----------------|-------------|-------------|
| Pd                                               | 334.8 ± 0.1 eV | 55 %        | 38%         |
| Pd-O                                             | 336 ± 0.1 eV   | 22%         | 43%         |
| Pd-O-Ce                                          | 337.5 ± 0.1 eV | 23%         | 19%         |
| Areas ratio*                                     |                |             |             |
| Pd3d <sub>5/2</sub> /(Pd3d <sub>5/2</sub> +Ce3d) |                | 0.89 ± 0.01 | 0.61 ± 0.01 |

\* The total areas were used and were not corrected with relative sensitivity factors.

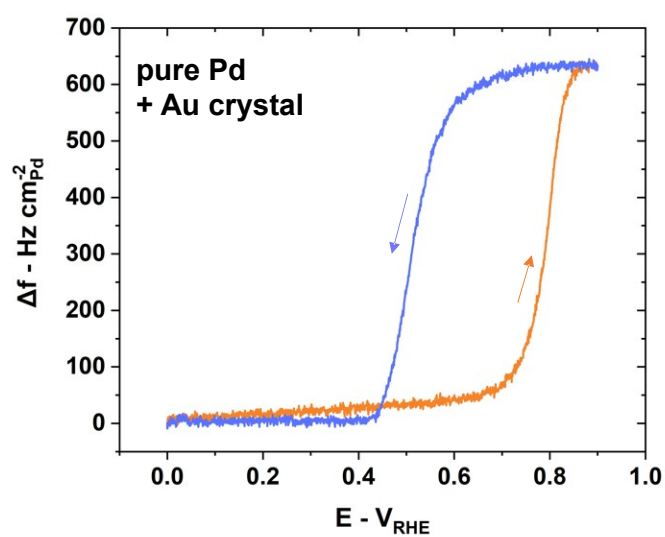

Figure S4: E-QCM measurements performed during HOR on pure Pd thin films deposited on a Au layer (similar to Pd/CeO<sub>2</sub> and CeO<sub>2</sub> crystals)

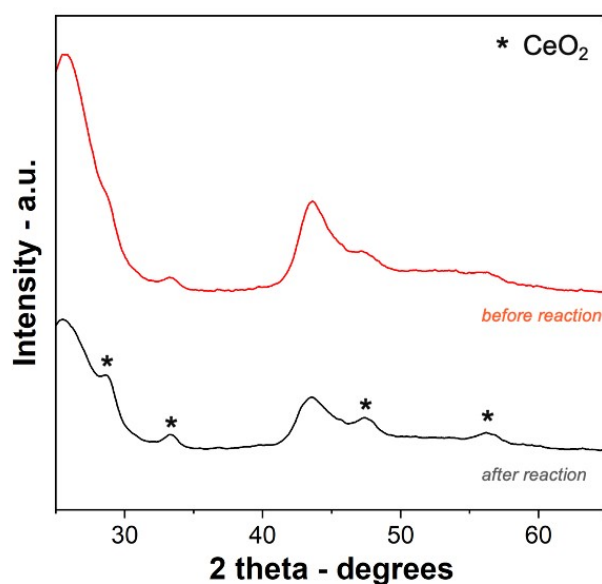

Figure S5: WAXS measurements of Pd/CeO<sub>2</sub> before and after reaction confirm the presence of a CeO<sub>2</sub> phase (ref for CeO<sub>2</sub>: Swatsitang et al., Physica B, 2016, 485, 14-20).

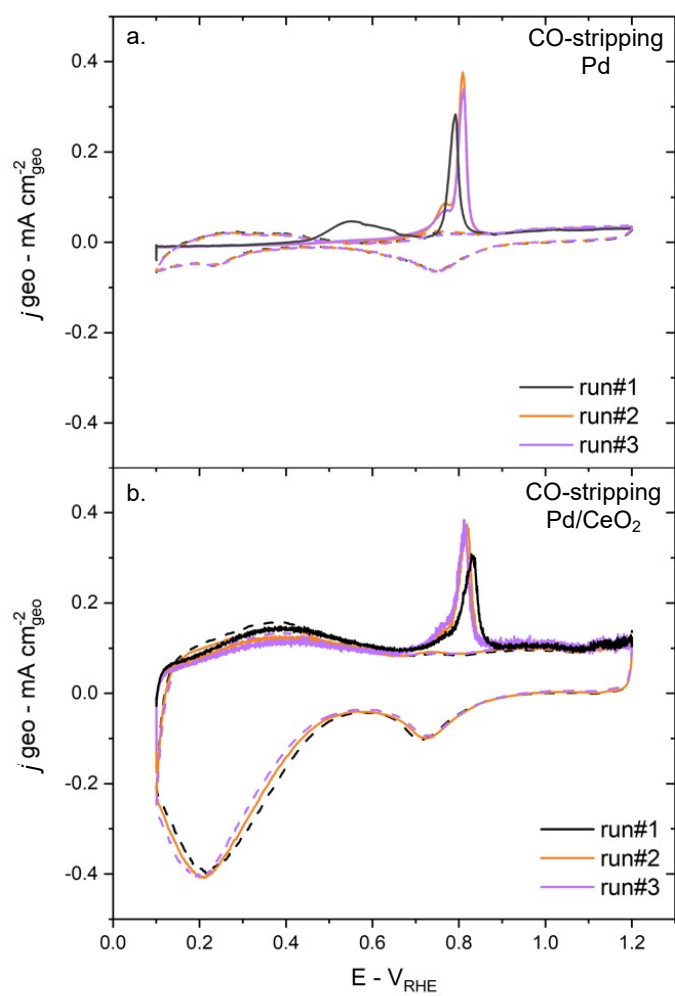

Figure S6: CO-stripping performed on a. Pd and b. Pd/CeO<sub>2</sub> directly after HOR reaction

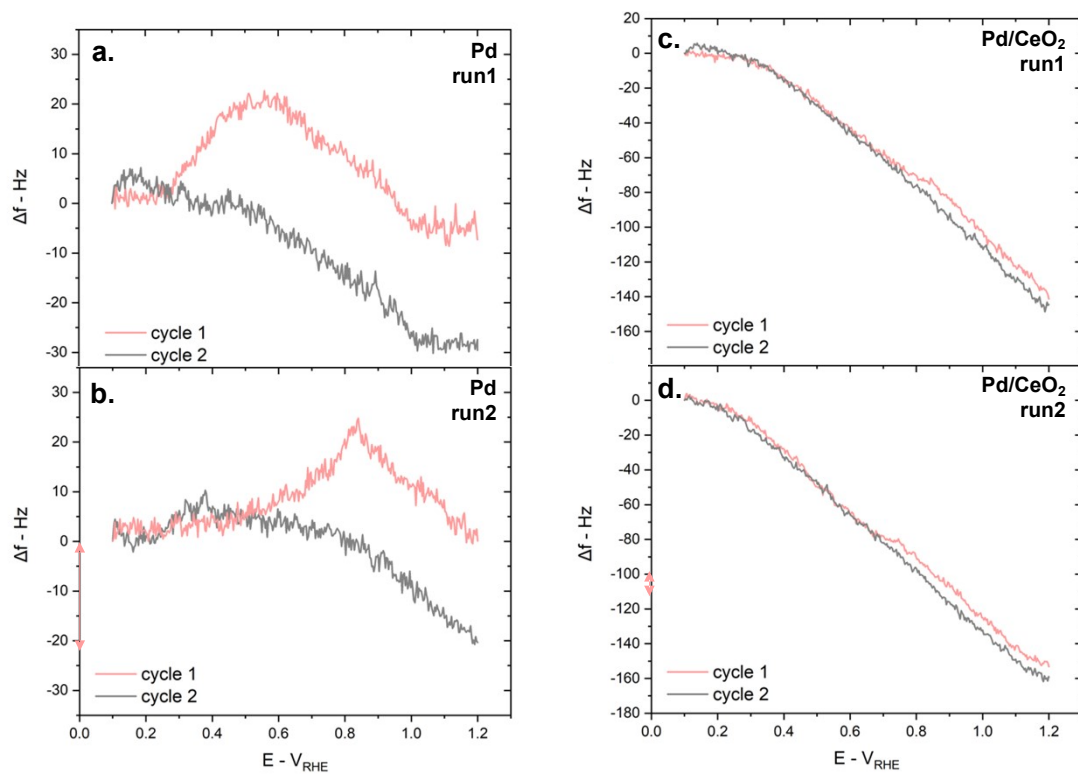

Figure S7: E-QCM measurements during CO-stripping on a. b. Pd and c. d. Pd/CeO<sub>2</sub>
